# Supplementary material for: Rivers beneath the surface: how riverine inputs shape sedimentation in a large peri-alpine lake
Source: Research Square preprint supplement (doi:10.21203/rs.3.rs-8204613/v1), 2026-01-14

**Rivers beneath the surface: how riverine inputs shape sedimentation in a large peri-alpine lake**

Emma Faval1, Guillaume Cunillera1, Jérémy Keller1, Nathalie Dubois2, David J. Janssen2, Natacha Pasche1

1 EPFL, ENAC, Limnology Center, Lausanne, Switzerland

2Eawag, Department Surface Waters Research and Management, Dübendorf and Eawag, Switzerland

Corresponding author: [natacha.pasche@epfl.ch](mailto:natacha.pasche@epfl.ch)

To be submitted to Aquatic Science

## **Supplementary information**

**Fig. S1: Mooring design of the sediment traps, composed of two cylinders.**

*
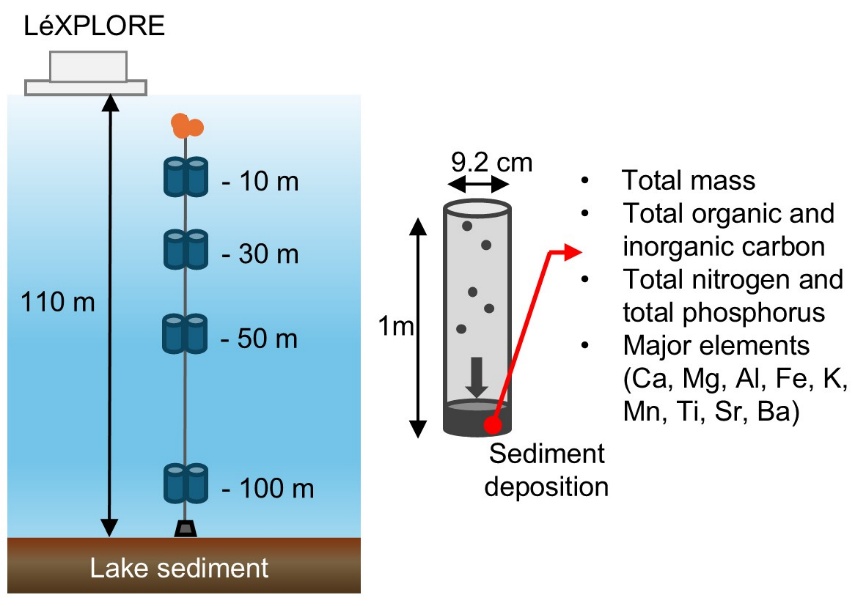
*

**Figure S2 Total mass, TP, TN, TIC and TOC fluxes (in mg m-2 d-1) from 2020 to 2024 for 30 m, 50 m, and 100 m.**

**
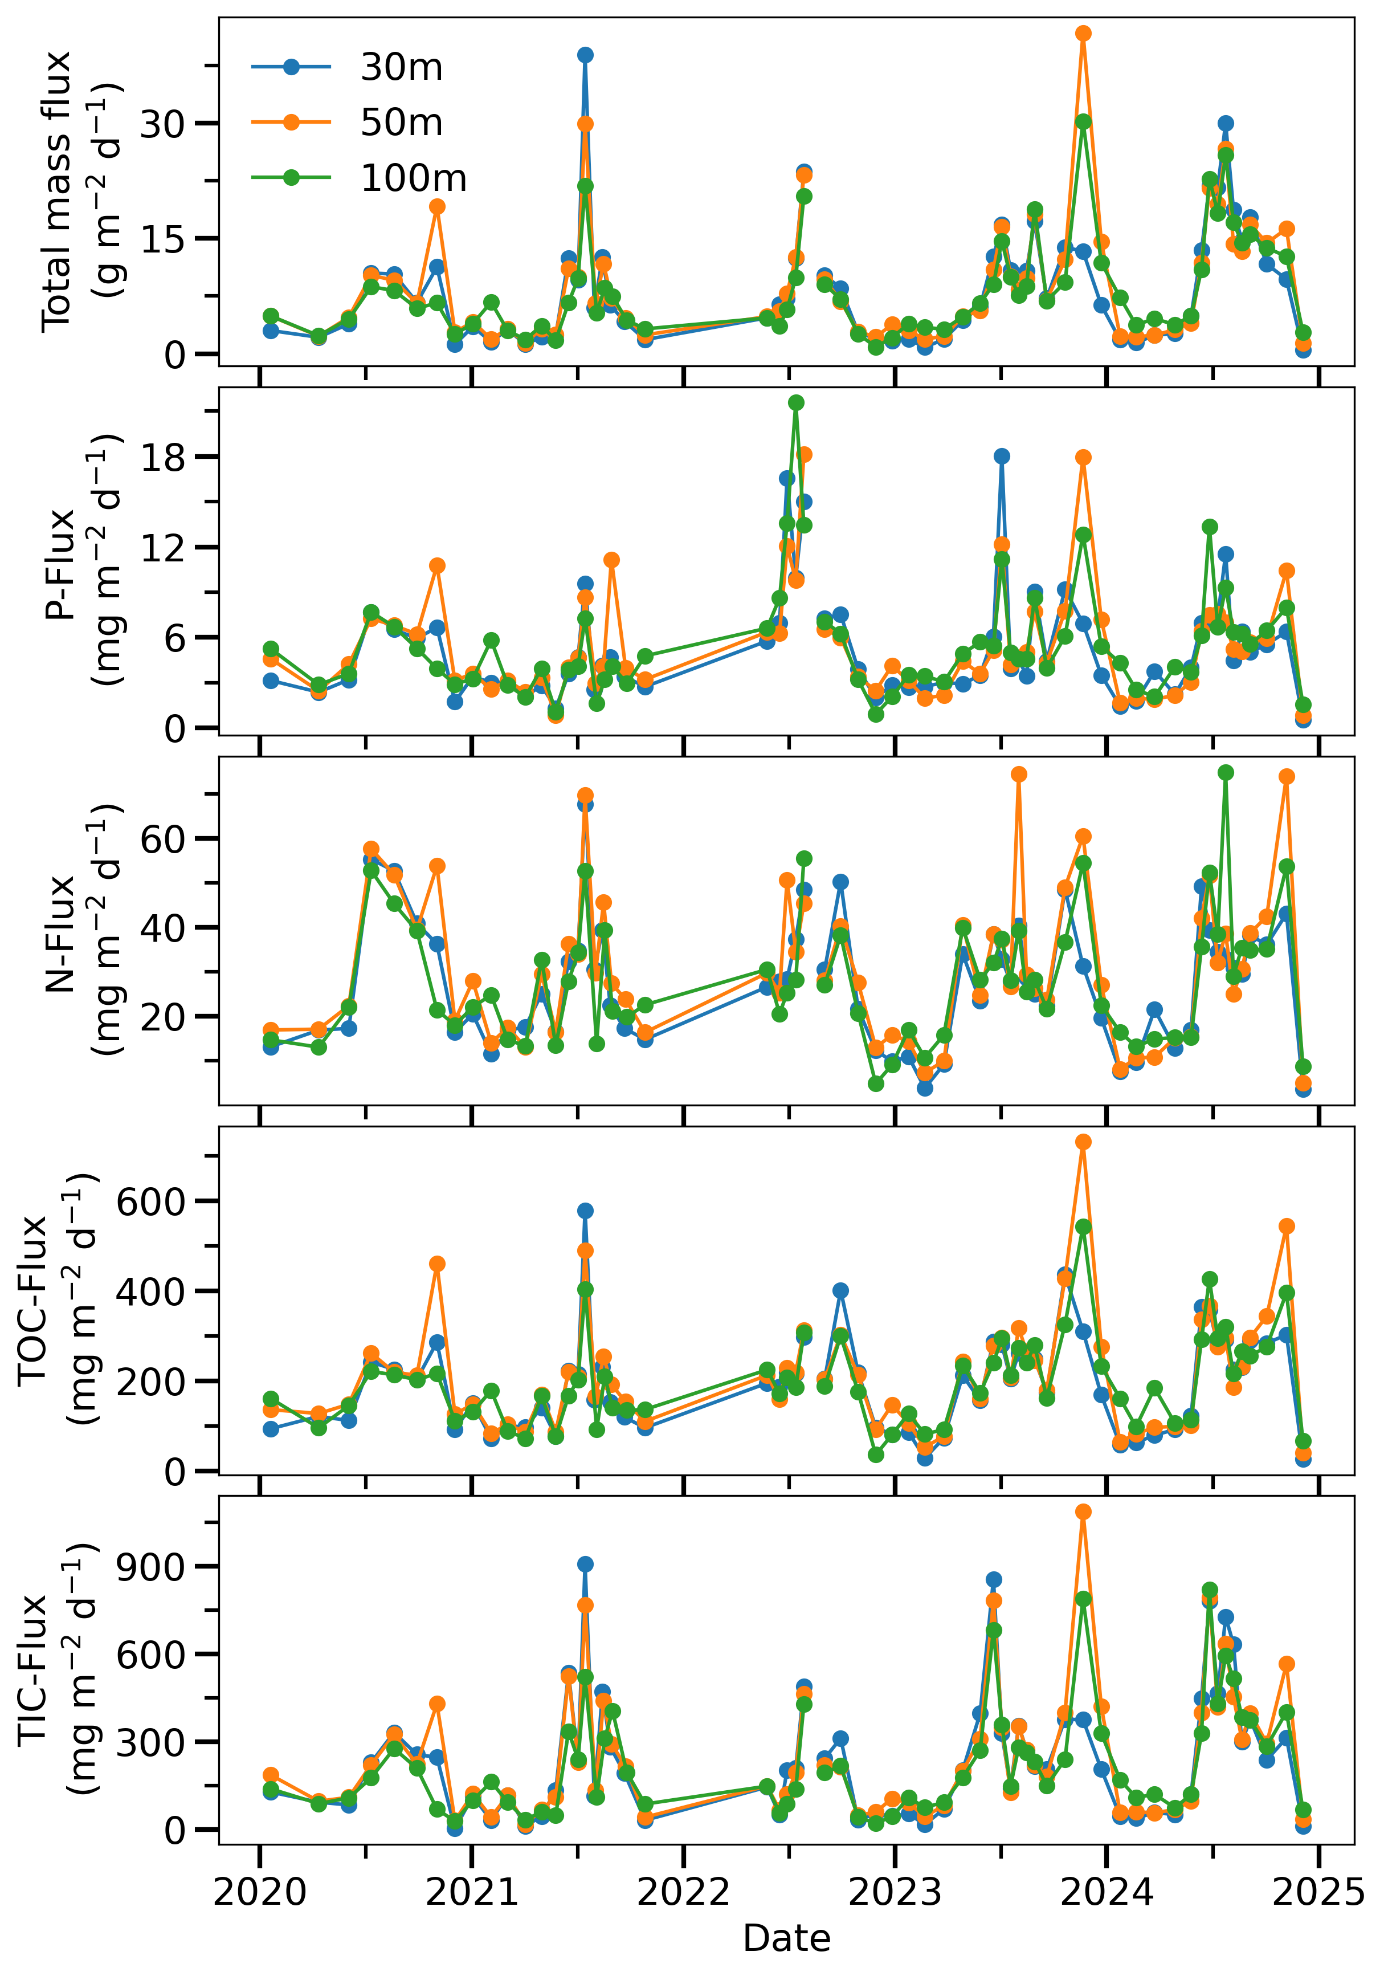
**

**Figure S3: Fluxes in mg m-2 d-1 at 10 m (red) and for the average of 30, 50 and 100 m (blue) for total phosphorus (a), total nitrogen (b), Total organic carbon (c) and total inorganic carbon (d) for the five years**


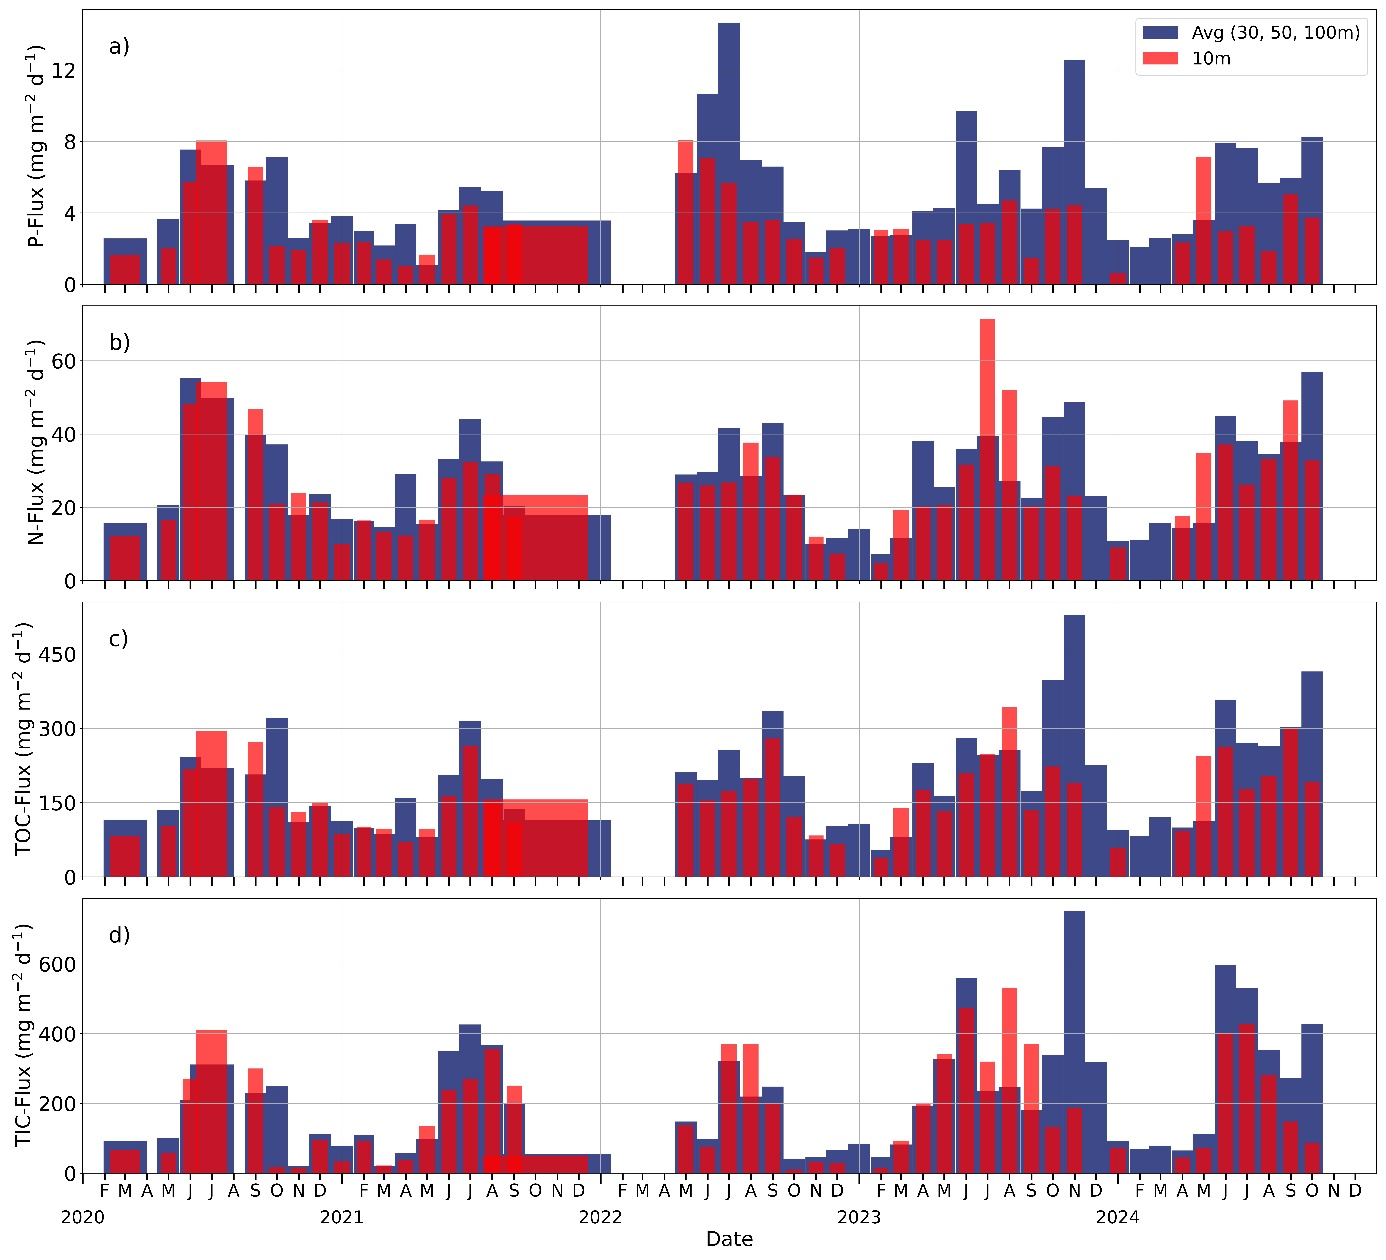


**Figure S4: Turbidity profiles on 9 and 18 July 2024 from the LéXPLORE platform. Two unusual turbidity peaks were observed around 60 m depth in the 18 July profile**


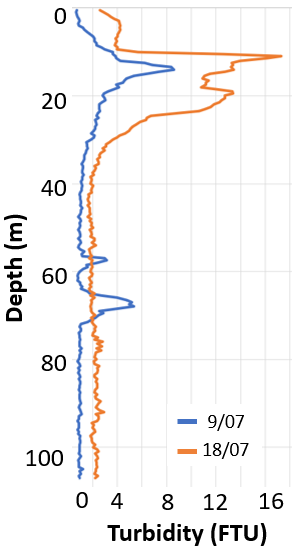


**Fig. S5 meteorological conditions on the LéXPLORE platform from 1st June to 31st August 2022: a) rainfall (mm), b) average wind speed (m s-1), c) average wave height (m), d) water velocities eastwards from 15 m to 80 m depth**


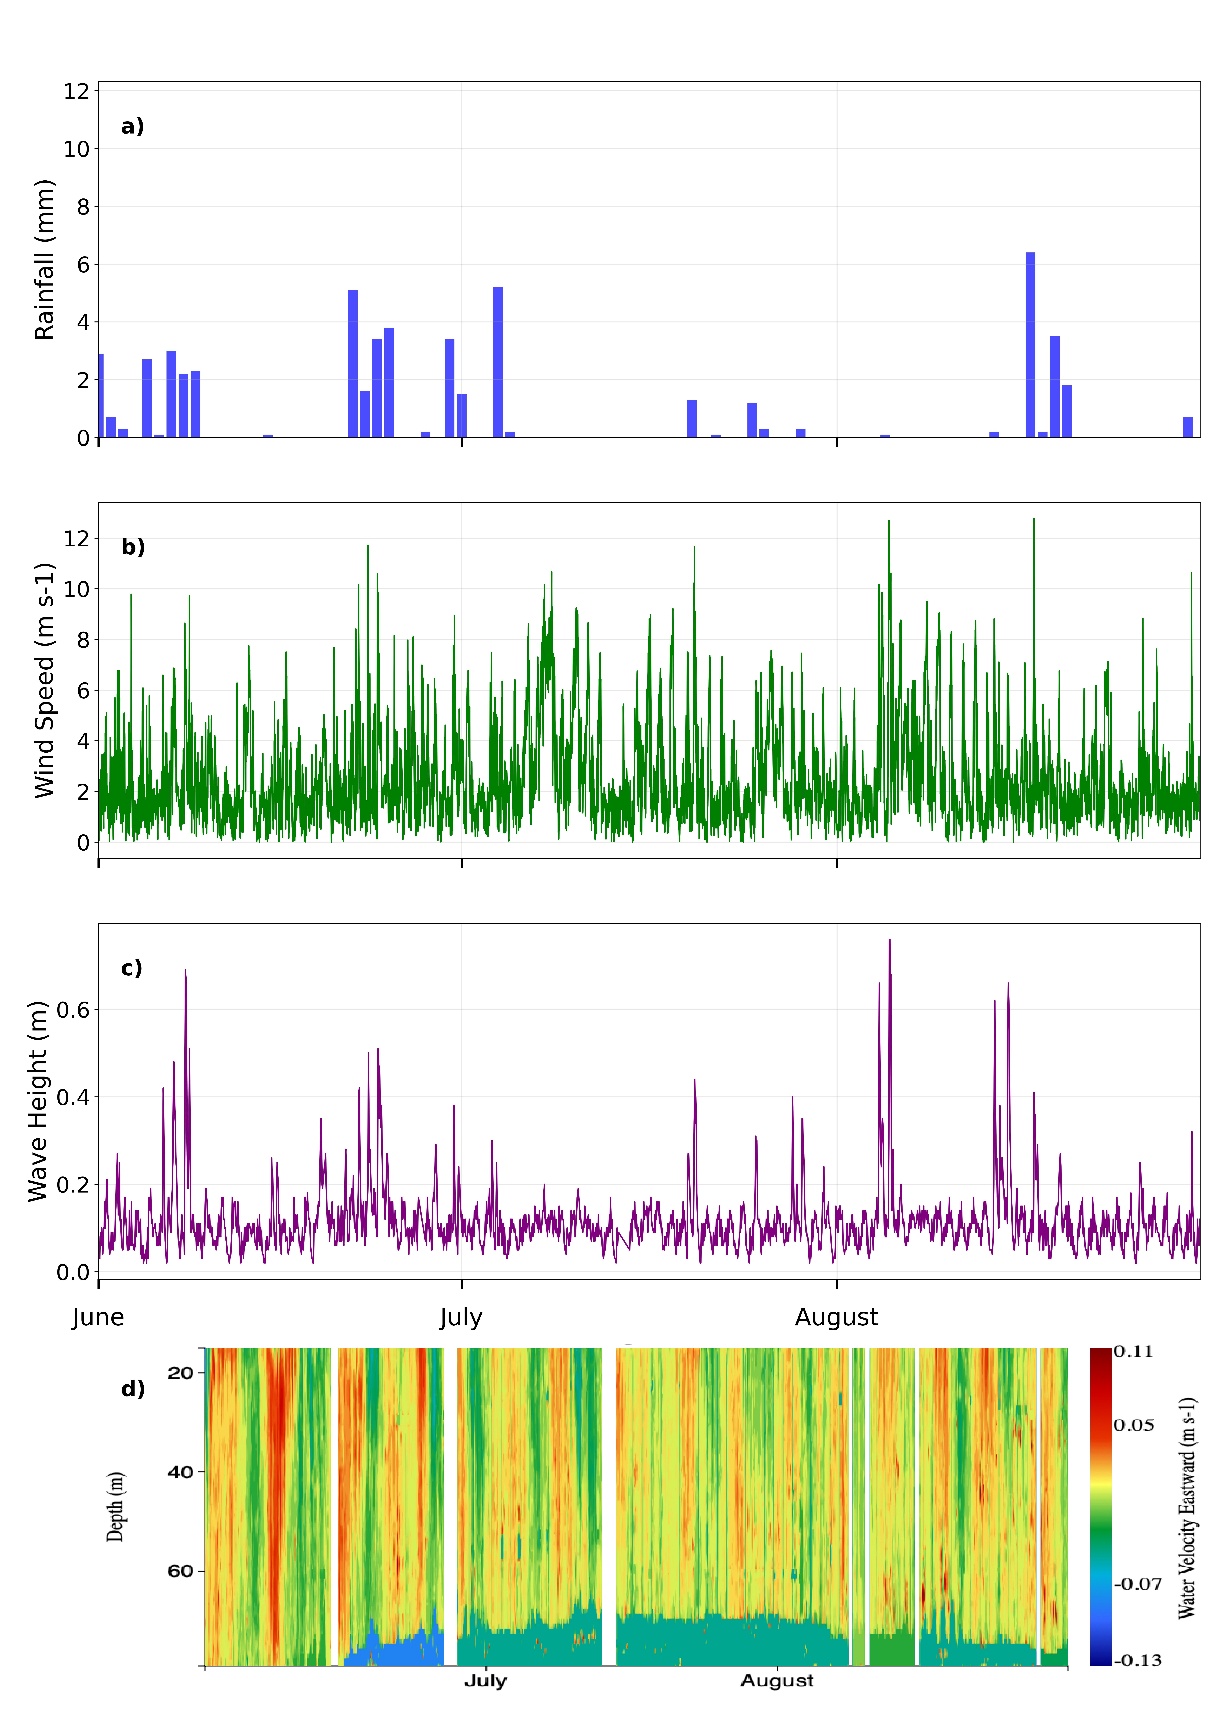


**Fig. S5 Meteorological conditions on the LéXPLORE platform from 1st October to 31st December 2023: a) rainfall (mm), b) average wind speed (m s-1), c) average wave height (m), d) water velocities eastwards from 15 m to 80 m depth**


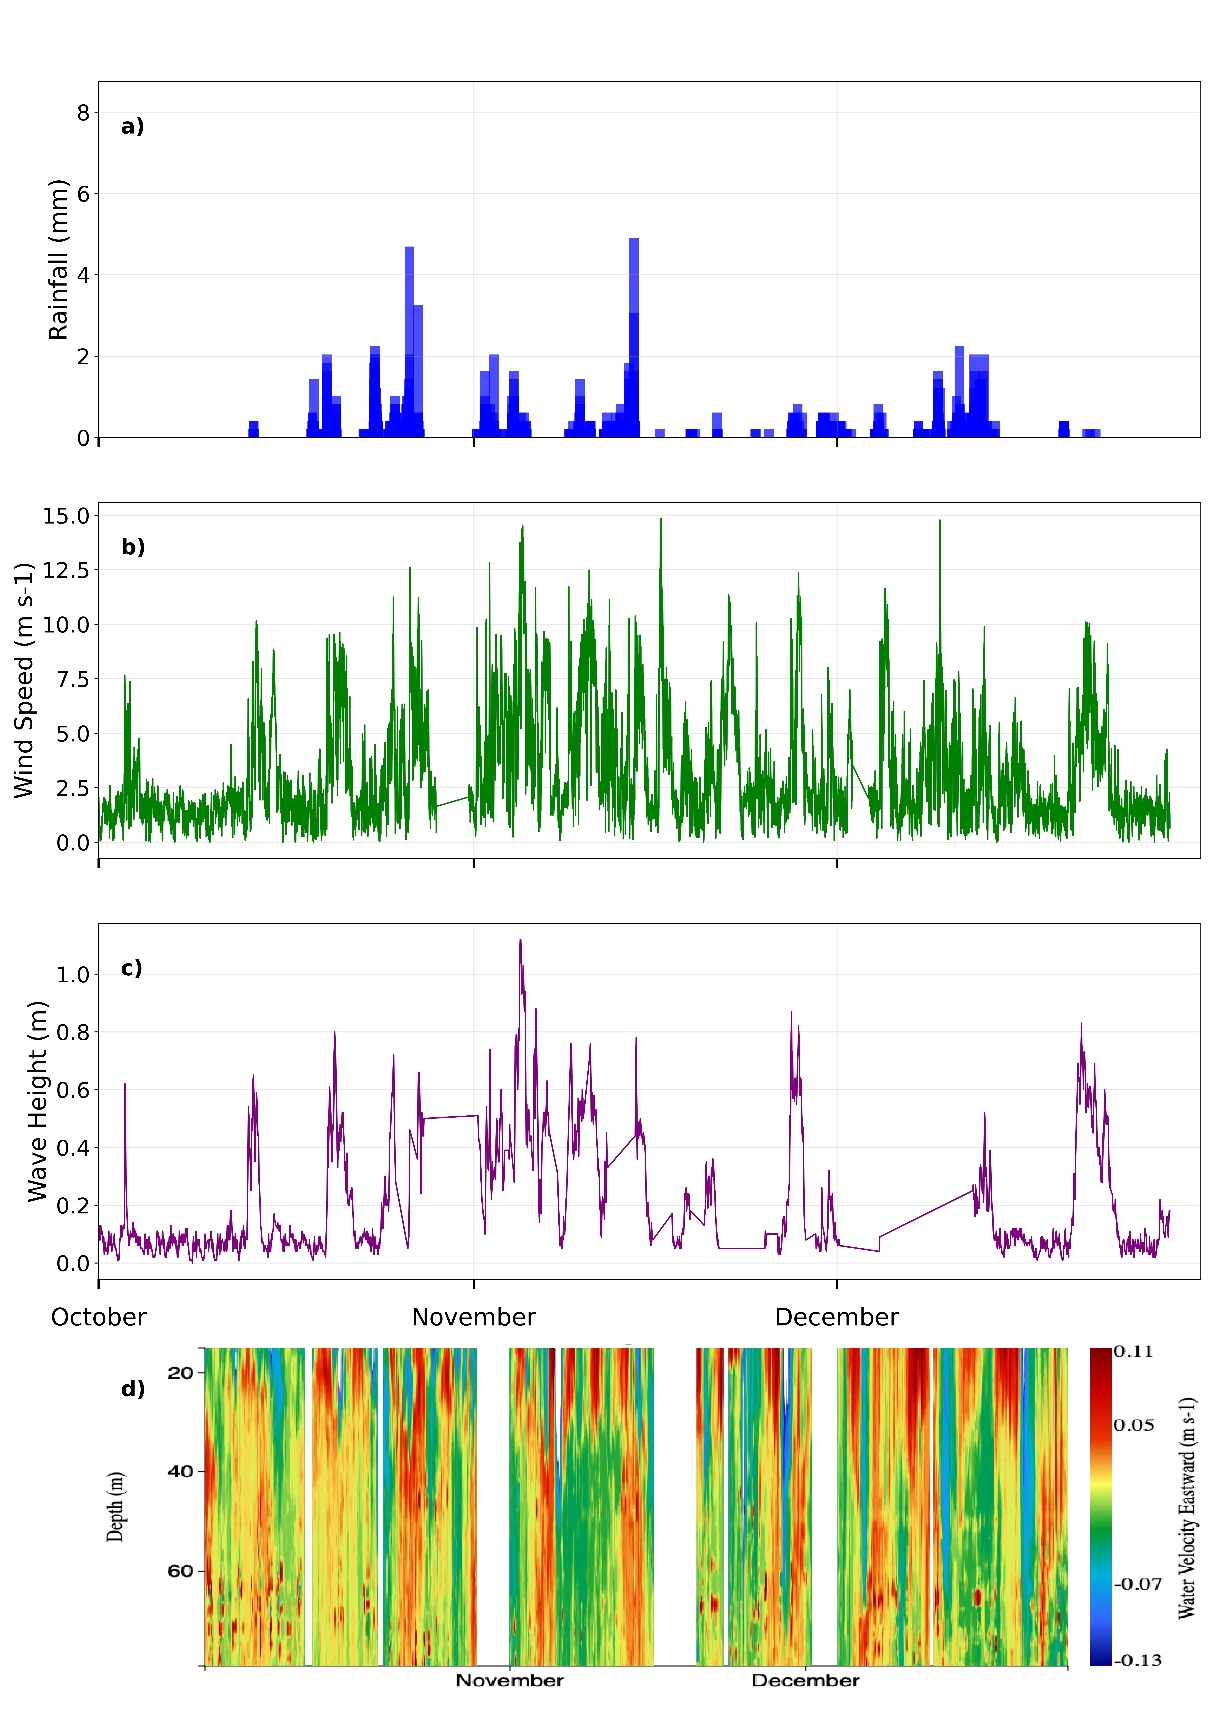

Supplement: Supplementary file 1 [file 8e8f76973fc2b2fb45b57703.docx]
